# Supplementary material for: Hydrogen and carbon isotope fractionation factors of aerobic methane oxidation in deep-sea water
Source: Copernicus journal article supplement (doi:10.5194/bg-18-5351-2021), 2021-10-01
Supplement: Supplementary file 1 [file bg-18-5351-2021-supplement.zip]

Archive with 2 entries (2 files):
- bg-18-5351-2021-supplement-title-page.pdf
- TableS1.xlsx
