# Supplementary material for: Hydrogen and carbon isotope fractionation factors of aerobic methane oxidation in deep-sea water
Source: Copernicus journal article supplement (doi:10.5194/bg-18-5351-2021), 2021-10-01
Supplement: Supplementary file 1 [file bg-18-5351-2021-supplement.zip › bg-18-5351-2021-supplement-title-page.pdf]

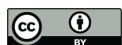

*Supplement of*

## **Hydrogen and carbon isotope fractionation factors of aerobic methane oxidation in deep-sea water**

**Shinsuke Kawagucci et al.**

*Correspondence to:* Shinsuke Kawagucci ([kawagucci@jamstec.go.jp](mailto:kawagucci@jamstec.go.jp)) and Taichi Yokokawa ([taichi.yokokawa@jamstec.go.jp](mailto:taichi.yokokawa@jamstec.go.jp))

- [bg-18-5351-2021-supplement-title-page.pdf](#)
- [TableS1.xlsx](#)

The copyright of individual parts of the supplement might differ from the article licence.
