# Supplementary material for: Hydrogen and carbon isotope fractionation factors of aerobic methane oxidation in deep-sea water
Source: Copernicus journal article supplement (doi:10.5194/bg-18-5351-2021), 2021-10-01
Supplement: Supplementary file 1 [file TableS1.xlsx]

## Sheet: plain
SITE	DEPTH	ALTITUDE	TEMP	DO	Turbidity	NH4	Mn	CH4	13C-CH4	2H-CH4	N2O	15N-N2O	18O-N2O	Typical cells	UCO	Total Cell Density	pATP
name	m	m	oC	umol/kg	FTU	nM	nM	nM	permil	permil	nM	permil	permil	cells/mL	cells/mL	cells/mL	pM
ANA	700	379	6.8561	98.16	0.036	30	NA	0.8	-20.17	NA	30	8.22	52.45	43325	NA	43325	3e-12
ANA	749.7	329.3	5.694	82.46	0.031	40	NA	0.8	-24.53	NA	30	8.28	53.11	33387	NA	33387	3e-12
ANA	799.5	279.5	5.2621	79.63	0.035	40	NA	2.7	-26.5	NA	32.1	8.58	53.5	40052	NA	40052	4e-12
ANA	849.1	229.9	4.8017	76.22	0.105	10	14.5	25	-30.18	-98	32.8	8.77	54.09	97718	3790	101508	3e-11
ANA	859.7	219.3	4.7669	75.98	0.118	20	19.1	23.7	-26.26	-102	28.3	8.53	54.29	106267	5071	111338	3.9e-11
ANA	869.5	209.5	4.7023	75.39	0.12	30	11.5	21.8	-27.28	-104	28.2	8.65	54.71	114891	3994	118886	4.2e-11
ANA	879.2	199.8	4.6968	75.48	0.071	10	22.1	21.5	-26.7	-92	28.8	8.46	54.2	114439	2401	116840	3.8e-11
ANA	889.8	189.2	4.6357	74.88	0.108	20	20.3	25.3	-26.78	-99	29.1	8.65	54.67	141194	4705	145899	4.9e-11
ANA	900.1	178.9	4.6096	74.32	0.138	0	21.9	25.8	-27.13	-99	27.4	8.22	54.08	159045	8075	167120	5.8e-11
ANA	909.8	169.2	4.5955	74.15	0.205	0	28.7	43.1	-27.86	-104	28.8	8.67	54.91	169414	7343	176756	4.2e-11
ANA	919.5	159.5	4.5598	71.64	1.844	0	94.4	99.7	-28.95	-114	26.7	8.49	54.65	191119	48730	239849	1.7e-11
ANA	929.7	149.3	4.5636	69.68	3.519	0	104.7	225.9	-27.88	-114	27.9	8.57	54.64	139461	143078	282539	1.49e-10
ANA	939.5	139.5	4.5543	68.13	5.249	20	145.7	253.7	-28.54	-119	28.3	8.55	54.59	128726	176929	305655	1.74e-10
ANA	949.9	129.1	4.5351	67.91	5.108	0	147	253.6	-27.96	-118	27.9	8.63	54.81	162652	181849	344501	2.1e-10
ANA	960.1	118.9	4.5258	67.8	4.84	0	170.1	242.5	-27.82	-114	28.4	8.54	54.4	186522	183163	369684	1.83e-10
ANA	969.9	109.1	4.5144	67.93	4.378	0	124.2	231.2	-28.16	-118	27.9	8.59	54.48	219446	177876	397322	2.28e-10
ANA	979.8	99.2	4.5039	68.8	3.177	0	114.8	184.2	-28.13	-116	29.6	8.8	54.98	290765	134099	424863	1.72e-10
ANA	989.6	89.4	4.5015	68.72	3.098	0	110.7	178.4	-28.54	-110	29.3	8.7	54.59	286856	144284	431140	2.48e-10
ANA	999.8	79.2	4.4989	68.98	2.594	30	108.9	159.4	-28.69	-113	29.6	8.52	54.52	332755	116129	448884	2.61e-10
ANA	1035.8	43.2	4.4821	68.96	2.287	40	137.2	153.2	-27.78	-113	29.5	8.79	55.01	372807	93971	466778	2.52e-10
ANA	1045.9	33.1	4.4758	69.03	1.849	110	119.9	140.8	-28.72	-112	29.7	8.66	54.77	405419	81019	486438	2.23e-10
ANA	1056.1	22.9	4.4625	69.85	1.107	30	17.6	119.1	-28.42	-113	31	8.62	54.48	400283	45091	445374	4.7e-11
ANA	1066.4	12.6	4.4457	70.41	0.799	10	76.7	108.6	-27.85	-109.7	29.5	8.7	54.6	385188	43476	428664	4.49e-11
HTM	1164.4	366.6	4.1334	71.37	0.036	10	4	9.9	-48.89	NA	29.7	8.67	54.76	30879	NA	30879	3e-12
HTM	1183.9	347.1	4.1022	71.28	0.034	10	4.9	16.6	-48.89	NA	29.2	8.65	55.08	31148	NA	31148	4e-12
HTM	1203.5	327.5	4.049	71.71	0.041	20	5.2	3.8	-38.6	NA	30.1	8.68	54.74	34776	NA	34776	5e-12
HTM	1223	308	4.0217	71.77	0.033	30	7	4.4	-38.42	NA	29.9	8.85	55.08	38265	NA	38265	4e-12
HTM	1244.2	286.8	3.9873	71.42	0.034	20	7.5	12.3	-41.07	-40	29.6	8.65	54.93	38889	NA	38889	7e-12
HTM	1263.3	267.7	3.9394	71.23	0.048	10	6.6	28.8	-41.79	-47	29.1	8.53	54.97	40752	NA	40752	8e-12
HTM	1283.4	247.6	3.9325	71.19	0.057	0	8.6	30.5	-39.56	-44	28.9	8.79	55.56	44219	NA	44219	1e-11
HTM	1303.6	227.4	3.8969	70.91	0.084	30	9.3	73.7	-42.23	-101	29.7	8.67	54.8	53187	4543.53	57731	1.6e-11
HTM	1323.9	207.1	3.8617	70.62	0.269	80	13.6	466.7	-46.76	-94	28.3	8.73	54.94	56450	20036.8	76486	3.2e-11
HTM	1343.6	187.4	3.8484	70.28	0.466	110	18	572.6	-46.86	-85	28.7	8.93	55.38	35810	NA	35810	3.3e-11
HTM	1363.4	167.6	3.8371	70.15	0.469	160	19.7	690.8	-47.38	-97	28.5	8.46	54.75	19735	NA	19735	4e-11
HTM	1383.8	147.2	3.8379	70.24	0.381	110	17.4	442.6	-45.26	-98	29.1	8.62	55.03	25872	NA	25872	4.7e-11
HTM	1402.8	128.2	3.8332	70.16	0.375	70	17.6	397.3	-44.84	-75	28.7	8.9	55.25	25969	NA	25969	4.5e-11
HTM	1423.7	107.3	3.8243	69.9	0.567	180	20.6	935.2	-48.28	-109	28.5	8.63	54.75	22190	NA	22190	3.9e-11
HTM	1434.2	96.8	3.8217	70.04	0.343	60	13.8	156.8	-42.93	-55	27.4	8.64	55.13	32085	NA	32085	3.5e-11
HTM	1443.7	87.3	3.8171	70.14	0.156	50	13.6	110.3	-39.72	-33	27.9	8.88	55.69	38168	NA	38168	2.9e-11
HTM	1453.7	77.3	3.8145	70.12	0.086	30	11	57.6	-35.59	17	27.8	8.43	55.16	35831	NA	35831	2.3e-11
HTM	1464	67	3.8065	70.2	0.082	40	13.2	59.6	-38.29	-13	29	8.76	55.4	34184	NA	34184	2.9e-11
HTM	1474.2	56.8	3.7976	70.1	0.257	70	15.3	274.6	-44.68	-90	28.9	8.72	55.19	27067	NA	27067	2.8e-11
HTM	1483.5	47.5	3.7982	70.16	0.153	70	15.2	234.2	-45.73	-84	28.8	8.65	55.22	28219	NA	28219	3.3e-11
HTM	1494	37	3.7967	69.99	0.414	140	18.7	563.9	-48.23	-102	28.5	8.51	54.87	19531	NA	19531	2.9e-11
HTM	1504.3	26.7	3.789	69.99	0.512	160	19.2	671.9	-48.09	-109	28.5	8.82	55.4	19821	NA	19821	2.5e-11
HTM	1514.3	16.7	3.7902	69.98	0.513	150	18.2	637.7	-48.08	-105	28.3	8.59	54.88	18863	NA	18863	2.7e-11
